# Supplementary material
Source: PubMed Central journal article supplement (PMC8097453)
Supplement: AAC.01317-20-s0001.pdf [file AAC.01317-20-s0001.pdf]

1 **Supplemental Material**

2 **Supplemental Text**

3 **Bioreactor-derived 503F $\Delta$ *liaR* isolate with *divIVA*<sup>I92F</sup> resisted DAP largely through**  
4 **an increased surface charge**

5 DivIVA is a scaffold protein at the division septum and cellular poles that aids in  
6 septum formation and chromosomal segregation(1). In a previous study, *divIVA*<sup>Q75K</sup> in *E.*  
7 *faecium* HOU503 was found to be correlated with DAP resistance through complex  
8 mechanisms that remain under study(2). When *divIVA*<sup>Q75K</sup> was present, DAP resistance  
9 was mediated by a combination of modest increases in cell surface charge but we  
10 speculate that in light of recent work on the mechanism of action of DAP in *S. aureus*(3),  
11 mutations to DivIVA may mitigate mislocalization of this critical cell division protein  
12 induced by DAP effects on the cell membrane.

13 Here, *divIVA*<sup>I92F</sup> was first observed on Day 5 and comprised 52% of the final  
14 503F $\Delta$ *liaR* bioreactor population (**Figure 3a**) and found in two end-point isolates (**Table**  
15 **3**). Both I92F and Q75K are in the predicted loop region between two N-terminal coiled  
16 coils, suggesting the importance of modifications in this region for DAP resistance. Using  
17 isolate 503F $\Delta$ *liaR* P25 (*divIVA*<sup>I92F</sup>, *cls*<sup>R211L</sup>, *entfae\_126*<sup>V30\*</sup>), we found that this isolate  
18 produced abnormal division septa, bound less PLL:FITC (indicating a more positive  
19 surface charge) and some evidence of a subpopulation that hyperaccumulated DAP  
20 without redistributing anionic phospholipid microdomains (Figures S3, S1-S2). This was  
21 consistent with what was observed previously in the HOU503 *divIVA*<sup>Q75K</sup> DAP-resistant  
22 isolates(2). The exact mechanism remains under investigation. Importantly, while we

23 observed a similar mutation that contributed to rapid acquisition of high levels of DAP  
24 resistance in HOU503(2), here, DAP adaptation in 503F $\Delta$ *liaR* was significantly delayed.

25 **Bioreactor-derived 503F $\Delta$ *liaR* isolates with *murAA*<sup>A149E</sup> may increase cell surface**  
26 **charge**

27 MurAA catalyzes the first committed step in peptidoglycan synthesis by  
28 transferring enolpyruvate from phosphoenolpyruvate (PEP) to uridine diphospho-N-  
29 acetylglucosamine (UNAG). This reaction is targeted by the antibiotic fosfomycin (FOF),  
30 which irreversibly binds and inactivates the MurA active site(4, 5). The *murAA*<sup>A149E</sup> allele  
31 was present at < 5% from Day 8-12 and grew to comprise 40% of the Day 18 population  
32 but then declined to 20% of the final population. *murAA*<sup>A149E</sup> was present in 11/19  
33 503F $\Delta$ *liaR* bioreactor-derived end-point isolates (Figure 2a and Table 3). A mutation  
34 within this enzyme could alter peptidoglycan synthesis leading to a remodeling of the cell  
35 wall, though there was no evidence of changes in cell wall thickness (Figure S5). It is  
36 possible that changes to the cell wall architecture may have decreased DAP access to  
37 the membrane, leading to increased resistance. These mutations, however, were  
38 observed in isolates with a variety of DAP MICs (ranging from 2-8 mg/L), suggesting that  
39 *murAA*<sup>A149E</sup> alone was insufficient to confer resistance and additional mutations were  
40 required for high resistance levels.

41 Two *murAA*<sup>A149E</sup> isolates with the fewest mutations, 503F $\Delta$ *liaR* P8 (*murAA*<sup>A149E</sup>,  
42 *cls*<sup>A20D</sup>, *entfae\_809*<sup>A70E</sup>, *entfae\_64*<sup>Y83\*</sup>) and 503F $\Delta$ *liaR* P60 (*murAA*<sup>A149E</sup>, *cls*<sup>N13I</sup>,  
43 *entfae\_126*<sup>V30\*</sup>), were selected for additional phenotypic analysis. Both isolates bound  
44 significantly less PLL:FITC than the ancestor without evidence of phospholipid  
45 microdomain remodeling (as visualized with NAO); however, paradoxically, both isolates

46 appear to bind more BDP:DAP than the ancestor (Figures S1-2,S4). So, while the cells  
47 had a modest increase in cell surface charge, it was not correlated with DAP repulsion.  
48 The presence of secondary mutations makes it difficult to make a clear association of  
49 *murAA*<sup>A149E</sup> to DAP resistance. However, the consistent identification of *murAA*<sup>A149E</sup> has  
50 led us to begin biochemical and structural studies of MurAA and MurAA<sup>A149E</sup>. In general,  
51 isolates bound less PLL:FITC and did not redistribute lipid microdomains, suggesting that  
52 the changes in by MurAA<sup>A149E</sup> function may indeed contribute to DAP-tolerance by  
53 changing the physical properties of the cell wall.

54 Interestingly, in 515F $\Delta$ *liaR*, *murAA*<sup>G220V</sup> was observed in three bioreactor-derived  
55 end-point isolates, each of which had an additional 12-33 mutations (Table 4). An isolate  
56 containing this mutation (P53) also exhibited a minor increase in cell surface charge  
57 without evidence of DAP repulsion (Figure S6). Interestingly, this *murAA* mutation was  
58 located alongside nine additional mutations over 460 Kb that were identical to mutations  
59 acquired by a hypermutator subpopulation. It is possible that these mutations were part  
60 of a homologous recombination event. Further discussion can be found below.

## 61 **VAN plasmid dynamics**

62 503F $\Delta$ *liaR* is a vancomycin (VAN)-resistant isolate that contains a plasmid  
63 encoding *vanH*, *vanA*, *vanX*, *vanY*, and *vanZ*. This isolate has an initial VAN MIC of >256  
64 mg/L. As was observed in HOU503 flask-transfer DAP adaptation (2), all flask-adapted  
65 strains of 503F $\Delta$ *liaR* resulted in VAN sensitivity with MICs falling from >256 to 2-8  $\mu$ g/ml.  
66 503F $\Delta$ *liaR* FT1-1/2, FT2-1/2, FT3-1, and FT4-1/2 all lost the VAN plasmid, as was  
67 observed in HOU503 adaptation (2). 503F $\Delta$ *liaR* FT5-1/2, however, showed evidence of  
68 reduced VAN coverage in the pileups, suggesting a reduction in plasmid copy number

69 which may contribute to the increase in VAN sensitivity. Because FT5-1/2 contained a  
70 *yvcS* mutation and had VAN plasmid coverage, this suggests that mutations to *yvcRS* do  
71 not necessitate the removal of the VAN plasmid. Instead, because flask-transfer isolates  
72 with multiple genotypes do lose the VAN plasmid, it suggests that the flask environment  
73 selects against VAN plasmid maintenance.

74 Renewed VAN sensitivity was also observed in several 503F $\Delta$ *liaR* bioreactor-  
75 derived isolates with diverse mutational profiles. There was no evidence of total plasmid  
76 loss in these isolates, however (Table S1). The VAN plasmid contains multiple  
77 transposases and insertional elements that are present in multiple locations throughout  
78 the *E. faecium* genome, causing these regions to spike in coverage when analyzing the  
79 read data. The unique regions on the plasmid include *vanHAX*. To determine if plasmid  
80 copy number was being affected, the ratio of average unique read coverage on the VAN  
81 plasmid compared to the average coverage of that isolate's genome was examined.  
82 Using this metric, there was no correlation between the plasmid coverage and the VAN  
83 MIC (Table S1). Therefore, it is likely that an undefined mechanism contributes to this  
84 increase in VAN sensitivity observed in diverse backgrounds and we are observing the  
85 "see-saw" effect.

#### 86 **515F $\Delta$ *liaR* evolution in a bioreactor**

87 515F $\Delta$ *liaR* mutations that were present at a minimum of 10% frequency for two  
88 consecutive days can be found in Figure 2b. Interestingly, four different genes contained  
89 mutations on Day 1. Five separate mutations were found downstream of the Plasmid 169-  
90 encoded *repA* on Day 1 comprising a total of 53% of the starting population. These SNPs  
91 were located +450, +496, +501, +558, and +718 nucleotides downstream of *repA* and

92 manual visualization of the sequencing reads suggests that these mutations were  
93 exclusive of each other. However, these mutations were not present in a no DAP  
94 bioreactor experiment, suggesting their importance in aiding against DAP.  
95 *Entf515F\_2210*, *entf515F\_641*, and *entf515F\_3080*, also present on Day 1, dropped in  
96 frequency upon DAP addition; each mutation was then able to find some success  
97 throughout adaptation but did not reach high frequencies- consistent with hitch-hiking.  
98 Interestingly, *murAA*<sup>G220V</sup> was first observed on Day 6 and maintained a low-level  
99 presence within the bioreactor throughout the rest of adaptation. This suggests that while  
100 *murAA*<sup>G220V</sup> had success in this population, other mutations provided a more significant  
101 advantage. The *metB*<sup>+C</sup> mutation appeared on Day 9 while *metB*<sup>+T</sup> and *rpoA*<sup>N288K</sup> first  
102 made an appearance on Day 10. These two populations then competed against each  
103 other in the bioreactor as evidenced by their opposing frequency profiles. Towards the  
104 end of adaptation, additional mutations likely contributed modest advantages in the DAP  
105 environment. Interestingly, **NO** mutations were observed in *cls*.

106 Perhaps surprisingly, a bioreactor-derived subpopulation developed a  
107 hypermutator phenotype by gaining a mutation in mismatch repair (MMR) gene, *mutM*.  
108 This mutation likely resulted in improper MMR causing the indiscriminate accumulation of  
109 a variety of mutations. Here, 515FΔ*liaR* P86 acquired 42 mutations (Table 3). This  
110 strategy of rapidly accumulating mutations in response to antibiotic stress has been  
111 observed in a variety of bacteria, including *Acinetobacter baumannii* and *Pseudomonas*  
112 *aeruginosa* (6, 7). *mutM*<sup>-14F</sup> first appeared at 5% on Day 15 but never reached over 10%  
113 of the population, and thus, is not represented in Figure 3b. Of note, this population  
114 acquired nine mutations over 460 Kb of the genome, including *murAA*<sup>G220V</sup> and *liaY*<sup>Y74N</sup>,

115 that were identical in 515F $\Delta$ *liaR* P31 and P53. Because the frequency of these mutations  
116 was not readily apparent before Day 10, when *metB*<sup>+T</sup> first appeared, it is possible that  
117 homologous recombination occurred from P86 into the P31/P53 lineage.

### 118 **515F $\Delta$ *liaR* no-DAP adaptation**

119 Because the *metB* mutations marked that a likely global change in metabolism was  
120 used to combat DAP, we wanted to confirm that these mutations evolved in response to  
121 DAP and not to the bioreactor environment itself. Therefore, 515F $\Delta$ *liaR* was evolved in  
122 the bioreactor with no DAP present for 12 days, when *metB* mutations had comprised a  
123 combined 68% of the population in the presence of DAP. At the end of this experiment,  
124 the final day population was sent for metagenomic sequencing. No mutations were  
125 present within *metB*, consistent with these mutations evolving in response to DAP and  
126 not the bioreactor environment. Mutations downstream of *repA* were not observed either,  
127 suggesting their supportive role in DAP resistance.

### 128 ***metB* fusion protein**

129 Surprisingly, in HOU503 and *E. faecium* DO, this gene fusion is already present,  
130 and align with 99% identity to the fusion found in DAP resistant 515F $\Delta$ *liaR* (Figure S8).  
131 The ability to switch from two gene products to one based upon a single base pair  
132 insertion suggests that this genome has recently diverged from HOU503 and DO. In  
133 HOU503, this full-length gene is annotated as *metB*, while in DO, it is annotated as *metC*,  
134 which in *E. coli* encodes cystothionase (8). The high levels of homology between *met*  
135 genes makes it difficult to assert identity and protein function (9). The 515F $\Delta$ *liaR* fusion  
136 protein aligns with 42% identity to *E. coli* K12 MetB and 31% identity to MetC, suggesting

137 that the fusion (or single protein in the case of HOU503 and DO) has similar activity to  
138 MetB. Extensive biochemical analyses need to be performed to verify the role this gene  
139 plays in cysteine metabolism in enterococci.

#### 140 **515F $\Delta$ *liaR* punctate NAO phenotype**

141 When incubated with NAO, 515F $\Delta$ *liaR* P29 (*metB*<sup>+C</sup>, sortase insertion, *gdpD*<sup>H29R</sup>,  
142 *entf515f\_1865*<sup>A327E</sup>) and P51 (*metB*<sup>+T</sup>, *rpoA*<sup>+500</sup>, *repA*<sup>+718</sup>, *yvcR*<sup>G15S</sup>, *entf515F\_191*<sup>V336V</sup>)  
143 produced a “dotted” phenotype, where NAO binding condensed to a single focal point in  
144 cells (Figures S7). Surprisingly, this redistribution of phospholipids does not show  
145 evidence of redistributed DAP binding. This was the first instance where we observe  
146 phospholipid redistribution without DAP redistribution. This phenotype was not observed  
147 in other isolates containing either *metB* mutation and the lack of similar alleles between  
148 these two isolates suggests that this dot phenotype is the result of convergent evolution.

#### 149 **Plasmid-encoded mutations**

150 Mutations downstream of a plasmid-encoded *repA* are found in HOU503(2),  
151 503F $\Delta$ *liaR*, and 515F $\Delta$ *liaR* adaptation (Tables 2-4). How exactly these mutations  
152 contribute to DAP resistance remains unclear. Interestingly, in 515F $\Delta$ *liaR* adaptation,  
153 when *repA* mutations were not present, the insertion of an insertional sequence element  
154 into *entf515F\_3139* (a Type A Sortase) appeared- this gene is located on the same  
155 plasmid. When isolates with this insertion underwent RNAseq analysis, it was determined  
156 that the two downstream genes, *entf515F\_3140-3041* (encoding an O-antigen like family  
157 protein and type A sortase, respectively) had increased expression compared to the  
158 ancestor, suggesting that these two genes may play a role in DAP resistance (data not  
159 shown). Type A Sortases play a role in gut colonization (10) and it is possible that these

160 mutations aided in adhesion within the bioreactor environment. Of note, mutations within  
161 sortases were not observed in flask-transfer populations. HOU503 Plasmid 1 and  
162 515F $\Delta$ *liaR* Plasmid 169 have homology between their sequences that encompasses 33  
163 genes and includes *repA* and *entf515F\_3041-3042*. Further qPCR should be performed  
164 in HOU503, 503F $\Delta$ *liaR*, and 515F $\Delta$ *liaR* to determine if all end-point isolates containing  
165 *repA* mutations have increased *entf515F\_3041* expression.

166

### 167 **Supplemental References**

- 168 1. Pinho MG, Errington J. 2004. A divIVA null mutant of *Staphylococcus aureus*  
169 undergoes normal cell division. *FEMS Microbiol Lett* 240:145–149.
- 170 2. Prater AG, Mehta HH, Kosgei AJ, Miller WR, Tran TT, Cesar A, Shamoo Y. 2019.  
171 Environment shapes the accessible daptomycin resistance mechanisms in  
172 *Enterococcus faecium*. *Antimicrob Agents Chemother*.
- 173 3. Grein F, Müller A, Scherer KM, Liu X, Ludwig KC, Klöckner A, Strach M, Sahl HG,  
174 Kubitscheck U, Schneider T. 2020. Ca<sup>2+</sup>-Daptomycin targets cell wall  
175 biosynthesis by forming a tripartite complex with undecaprenyl-coupled  
176 intermediates and membrane lipids. *Nat Commun* 11:1–11.
- 177 4. Kahan FM, Kahan JS, Cassidy PJ, Kropp H. 1974. The mechanism of action of  
178 fosfomicin (phosphonomycin). *Ann N Y Acad Sci* 235:364–386.
- 179 5. Skarzynski T, Mistry A, Wonacott A, Hutchinson SE, Kelly VA, Duncan K. 1996.  
180 Structure of UDP-N-acetylglucosamine enolpyruvyl transferase, an enzyme



- 181 essential for the synthesis of bacterial peptidoglycan, complexed with substrate  
182 UDP-N-acetylglucosamine and the drug fosfomycin. *Structure* 4:1465–1474.
- 183 6. Hammerstrom TG, Beabout K, Clements TP, Saxer G, Shamoo Y. 2015.  
184 *Acinetobacter baumannii* repeatedly evolves a hypermutator phenotype in  
185 response to tigecycline that effectively surveys evolutionary trajectories to  
186 resistance. *PLoS One* 10:e0140489.
- 187 7. Mehta HH, Prater AG, Shamoo Y. 2017. Using experimental evolution to identify  
188 druggable targets that could inhibit the evolution of antimicrobial resistance. *J*  
189 *Antibiot (Tokyo)* 1–8.
- 190 8. Simon M, Hong JS. 1983. Direct homocysteine biosynthesis from O-  
191 succinylhomoserine in *Escherichia coli*: An alternate pathway that bypasses  
192 cystathionine. *J Bacteriol* 153:558–561.
- 193 9. Ferla MP, Patrick WM. 2014. Bacterial methionine biosynthesis. *Microbiol (United*  
194 *Kingdom)* 160:1571–1584.
- 195 10. Kristich CJ, Chandler JR, Dunny GM. 2007. Development of a host-genotype-  
196 independent counterselectable marker and a high-frequency conjugative delivery  
197 system and their use in genetic analysis of *Enterococcus faecalis*. *Plasmid*  
198 57:131–144.

199 **Supplemental Figures**

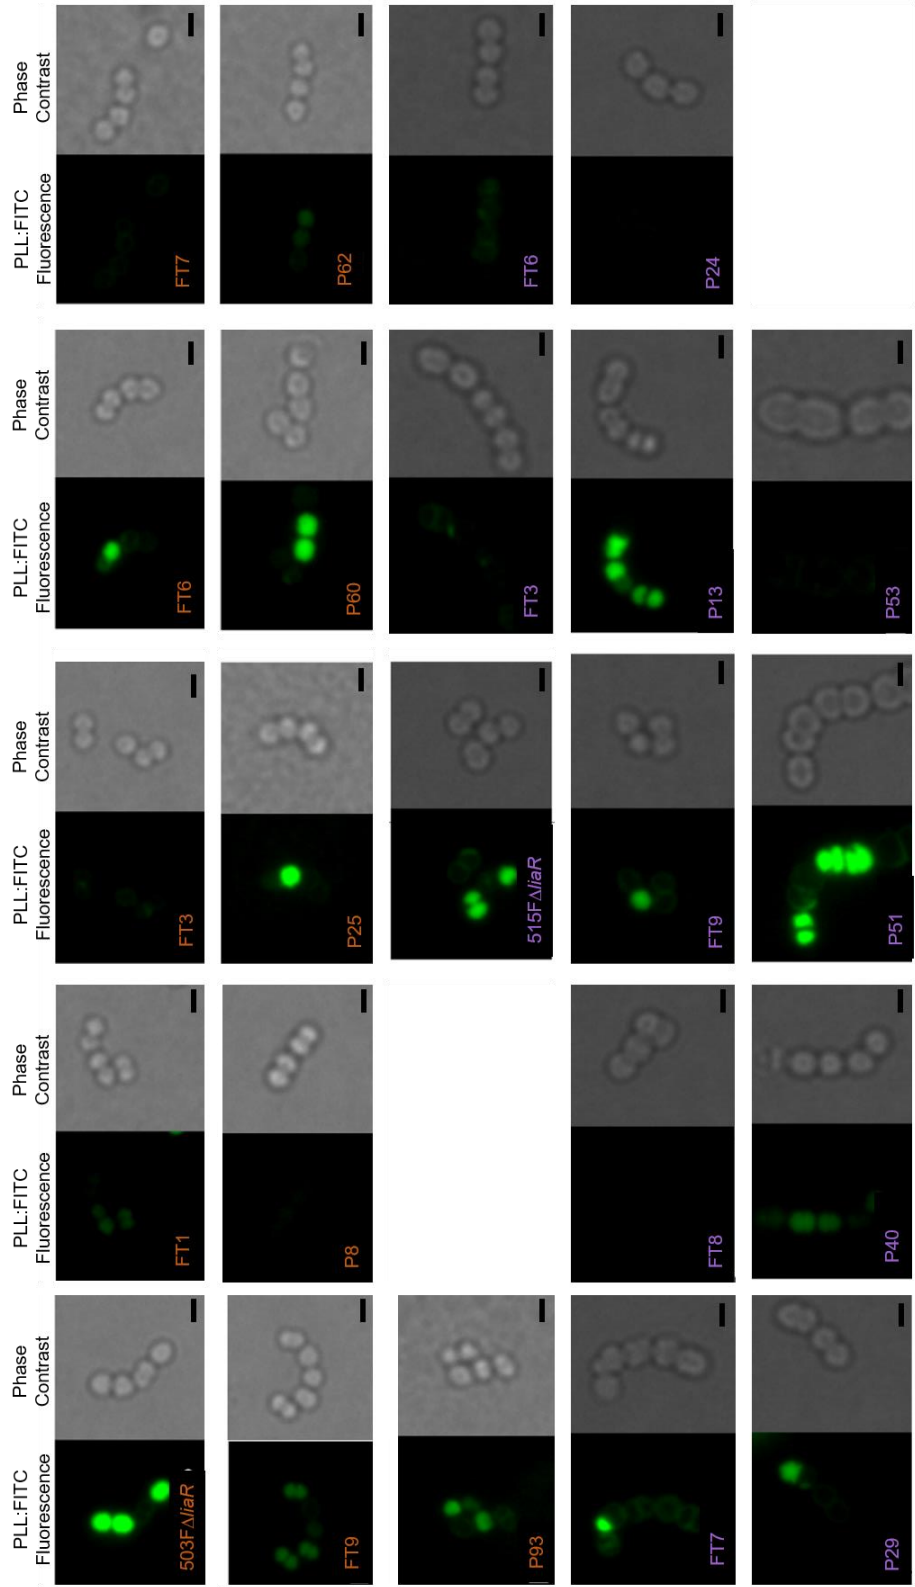

201 **Figure S1. DAP-resistant end-point isolate PLL:FITC binding patterns.** Isolates were  
202 incubated with PLL:FITC to determine cell surface charge. Isolates in orange were  
203 derived from 503F $\Delta$ liaR while isolates in purple were derived from 515F $\Delta$ liaR. Scale bars  
204 show 1  $\mu$ m.

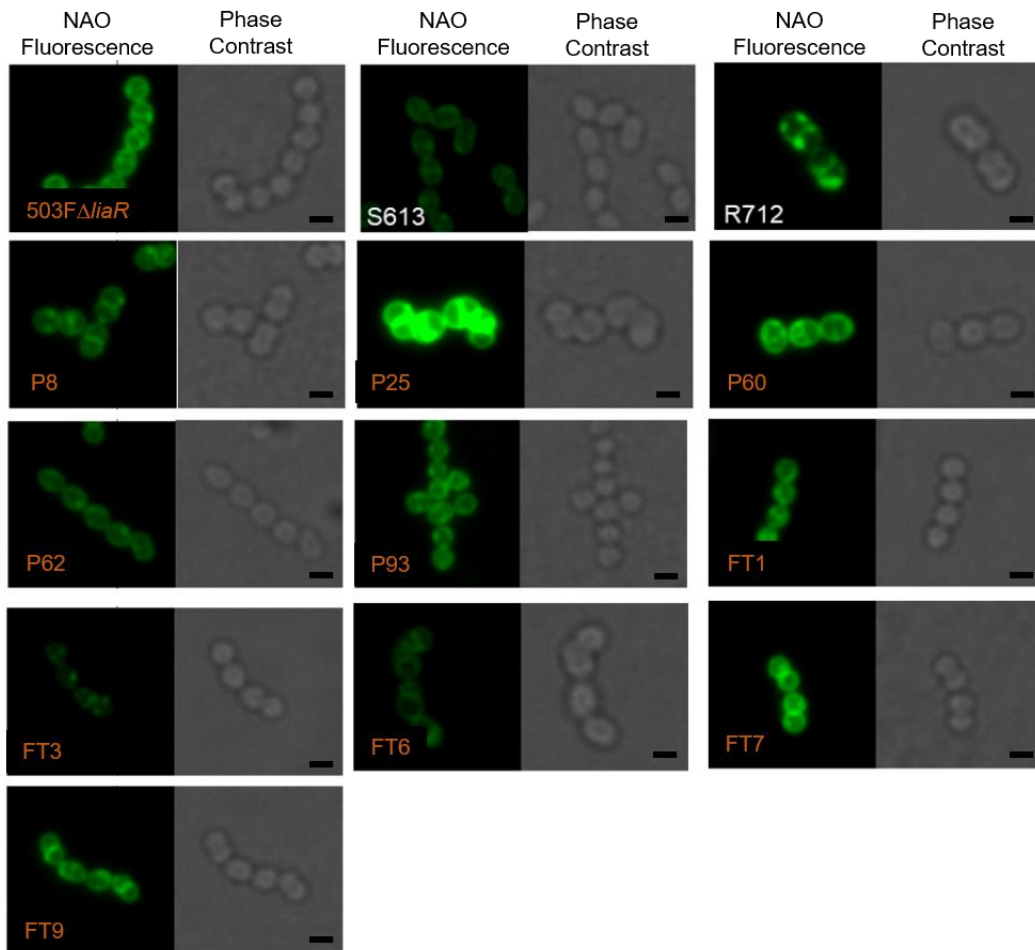

205  
206 **Figure S2. 503F $\Delta$ liaR isolates incubated with NAO.** Isolates were incubated with NAO  
207 to determine membrane phospholipid distribution. *E. faecalis* S613 is a control showing  
208 uniform NAO staining while *E. faecalis* R712 is a control showing phospholipid  
209 redistribution. Scale bars indicate 1  $\mu$ m.

210

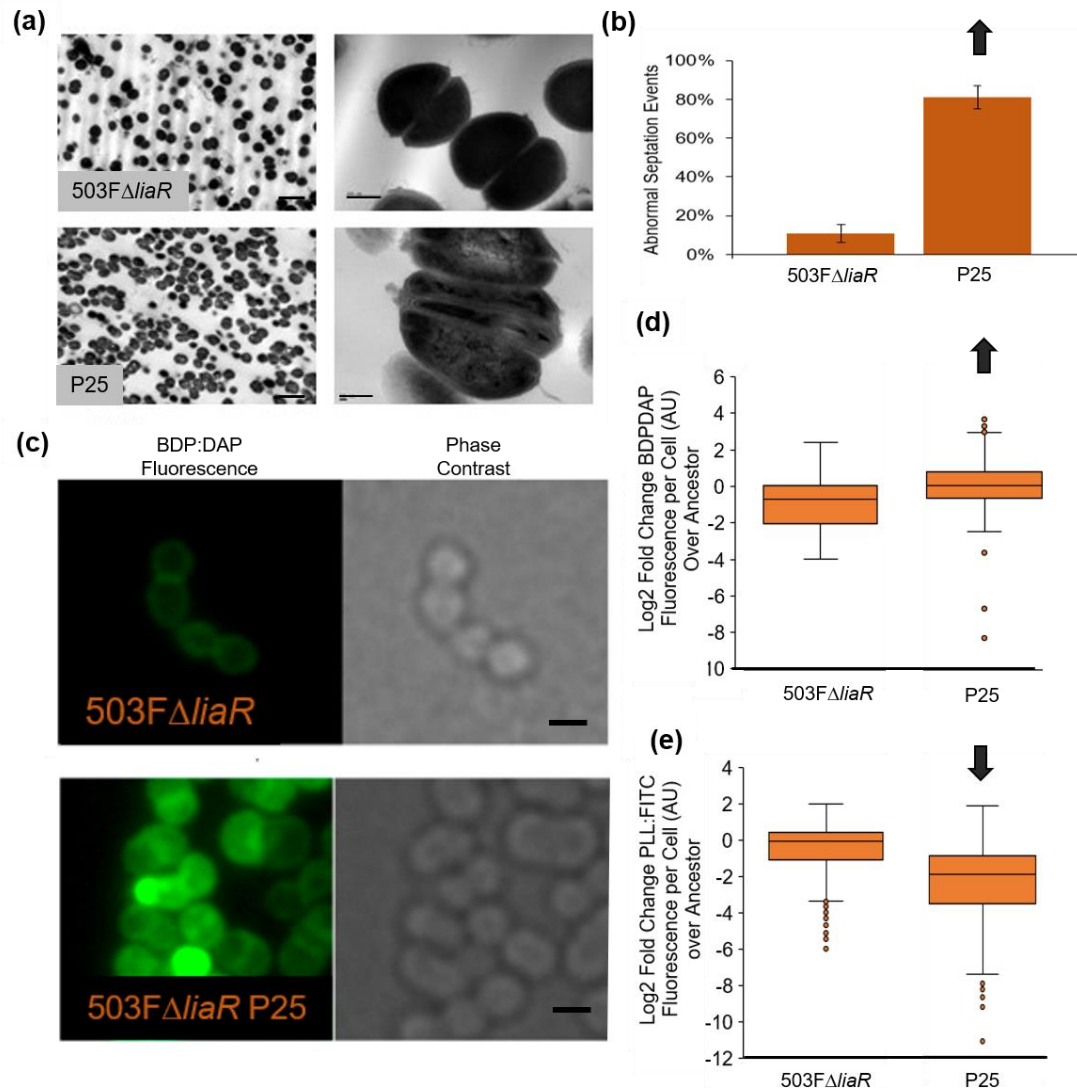

211

212 **Figure S3. 503FΔliaR bioreactor-derived isolate with *divIVA*<sup>I92F</sup> had aberrant septal**

213 **formation. (a)** TEM with scale bars indicating 2 μm (left) and 200 nm (right). **(b)** Aberrant

214 septation events were quantified and significance determined by Student's T test with

215 (p<0.05). **(c)** Isolates incubated with 32 μg/ml BDP:DAP with scale bars indicating 1 μm.

216 **(d)** Quantification of BDP:DAP using ImageJ. **E.** Quantification of PLL:FITC using ImageJ.

217 Images found in **Figure S1**. Arrows indicate significance compared to the ancestor

218 (p<0.05) using Mann-Whitney with *post hoc* Holm-Bonferroni adjustment. Experiment

219 performed in duplicate on separate days.

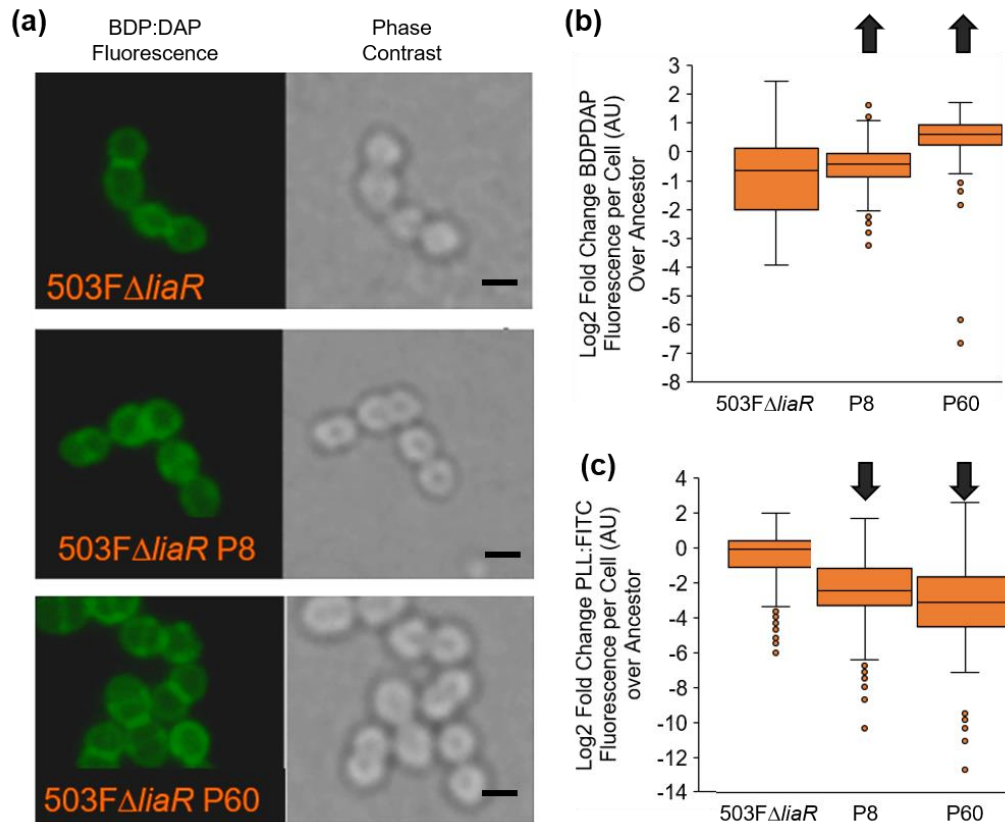

220

221 **Figure S4. *503FΔliaR* bioreactor-derived isolates with *murAA*<sup>A149E</sup> may increase cell**  
 222 **surface charge. (a)** Isolates incubated with 32 μg/ml BDP:DAP. Scale bars indicate 1  
 223 μm. **(b)** Quantification of BDP:DAP using ImageJ. **(c)** Quantification of PLL:FITC using  
 224 ImageJ. Images found in **Figure S1**. Arrows indicate significance compared to the  
 225 ancestor ( $p < 0.05$ ) using Mann-Whitney with post hoc Holm-Bonferroni adjustment.  
 226 Experiment performed in duplicate on separate days.

227

228

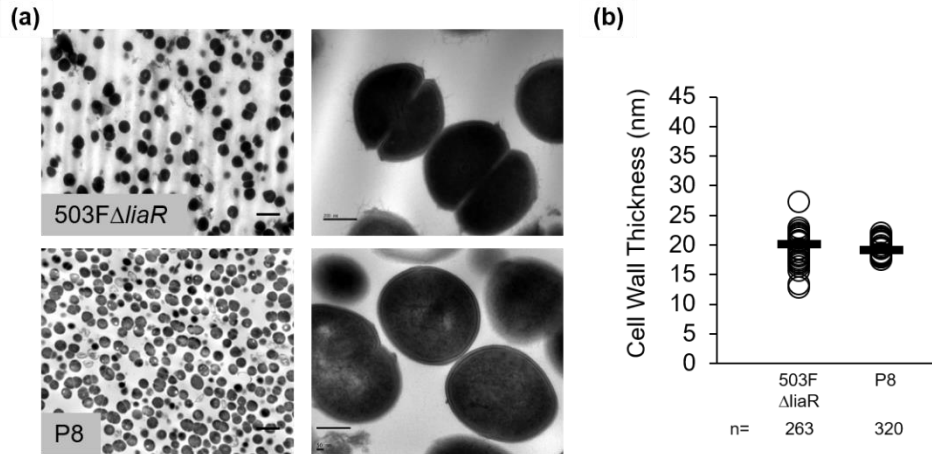

229

230 **Figure S5. 503FΔliaR bioreactor-derived isolate with mutation to *murAA* does not**  
 231 **have altered cell morphology. (a)** TEM to observe cell morphology of 503FΔliaR (top)  
 232 and P8 (*murAA*<sup>A149E</sup>, *cls*<sup>A20D</sup>, *entfae\_809*<sup>A70E</sup>, and *entfae\_64*<sup>Y83\*</sup>; bottom) with scale bars  
 233 showing 2 μm (left) and 200 nm (right). **(b)** ImageJ was used to quantify cell wall thickness  
 234 in each isolate. No statistical significance (p<0.05) was observed using Student's T-Test.

235

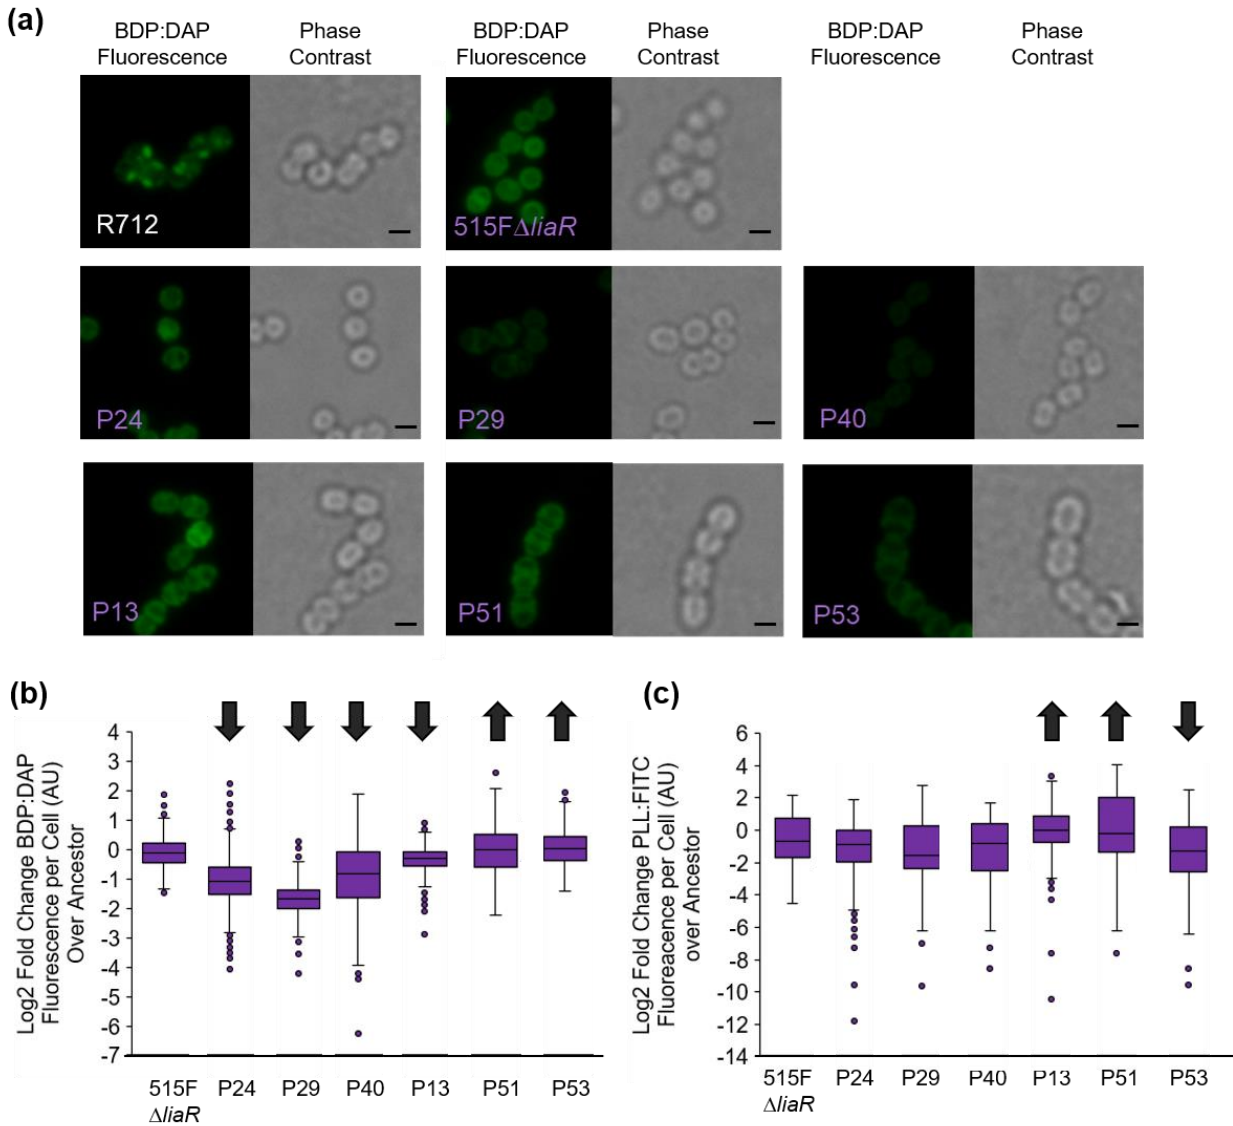

236

237 **Figure S6. 515F $\Delta$ liaR bioreactor-derived isolates with *metB* mutations produced**  
 238 **variable phenotypes. (a)** Isolates incubated with 32  $\mu$ g/ml BDP:DAP. *E. faecalis* R712  
 239 is a control showing redistributed BDP:DAP binding. Scale bars indicate 1  $\mu$ m. **(b)**  
 240 Quantification of BDP:DAP using ImageJ. **(c)** Quantification of PLL:FITC using ImageJ.  
 241 Images found in **Figure S1**. Arrows indicate significance compared to the ancestor  
 242 ( $p < 0.05$ ) using Mann-Whitney with post hoc Holm-Bonferroni adjustment. Experiment  
 243 performed in duplicate on separate days.

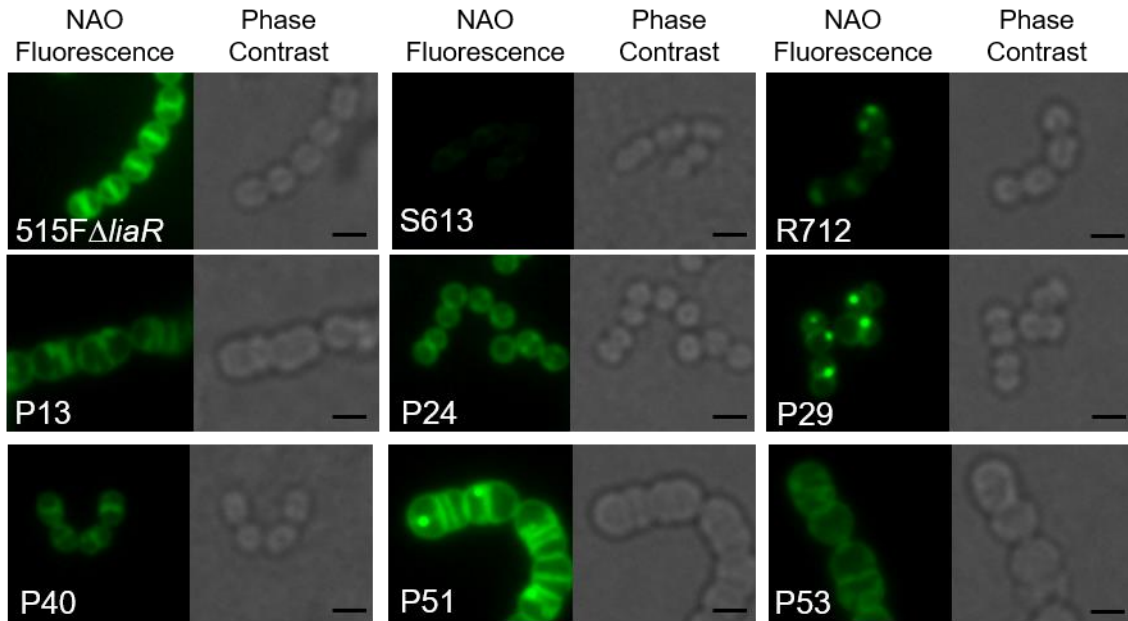

244

245 **Figure S7. 515FΔ*liaR* bioreactor-derived isolates with *metB* mutations produce**  
 246 **interesting membrane structures.** Isolates were incubated with NAO to identify  
 247 differences in membrane structure.

248

249



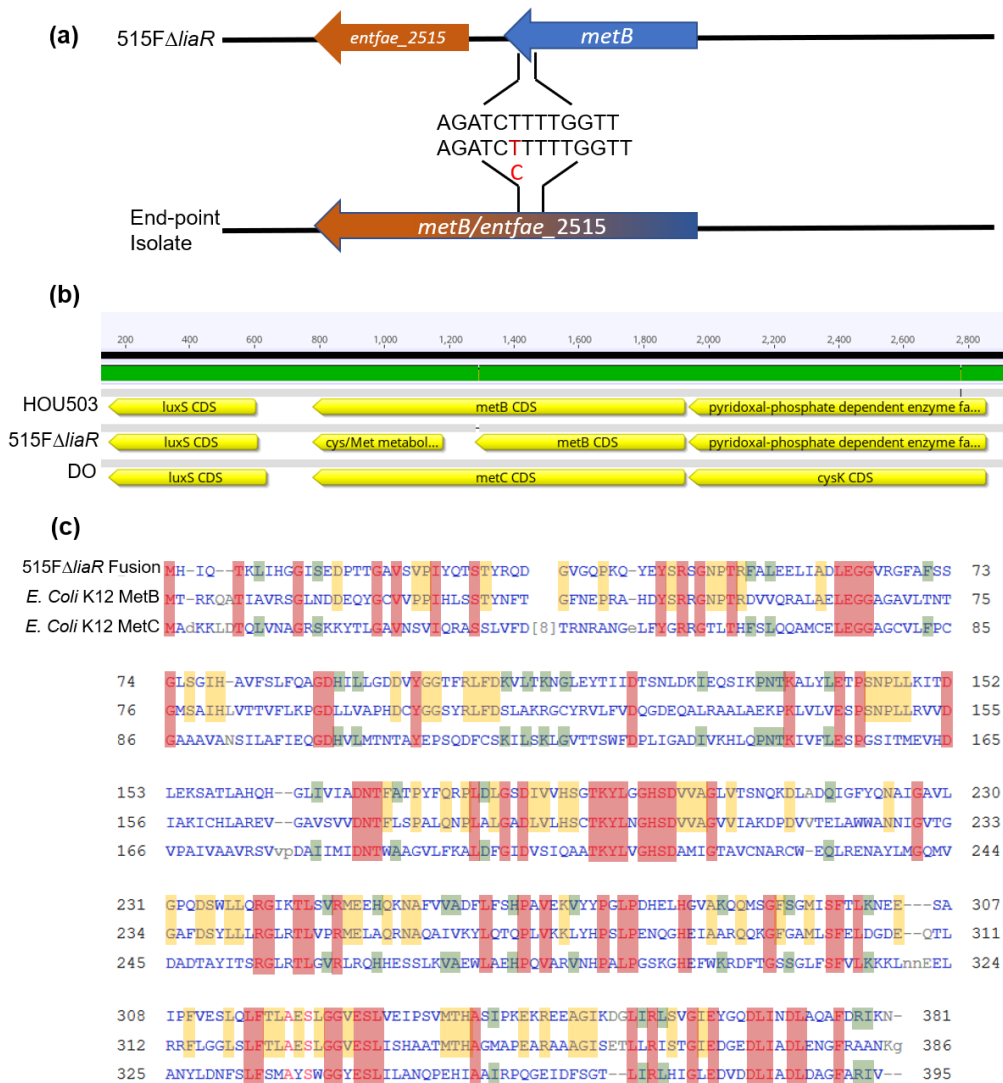

250

251 **Figure S8. 515FΔ*liaR* *metB* mutations resulted in the in-frame fusion of two gene**

252 **products. (a) Schematic representation of the nucleotide insertion site. (b) Alignment of**

253 **three *E. faecium* genomes showing the relatedness of these species. (c) Alignment of**

254 **515FΔ*liaR* fusion protein with *E. coli* MetB and MetC showing identities- red is shared by**

255 **all, yellow with MetB, and green with MetC.**

256

257

258

259 **Supplementary Tables**260 **Table S1. 503F $\Delta$ liaR bioreactor-derived isolate VAN plasmid coverage.**

|                                    | <b>Genome<br/>Avg Cov</b> | <b>Plasmid<br/>Avg Cov</b> | <b>Plasmid:Genome<br/>Ratio</b> | <b>VAN<br/>MIC</b> |
|------------------------------------|---------------------------|----------------------------|---------------------------------|--------------------|
| <b>503F<math>\Delta</math>liaR</b> | 353                       | 338                        | 0.96                            | >256               |
| <b>P8</b>                          | 328                       | 117                        | 0.36                            | >256               |
| <b>P15</b>                         | 385                       | 460                        | 1.19                            | 2                  |
| <b>P25</b>                         | 456                       | 216                        | 0.47                            | 2                  |
| <b>P30</b>                         | 413                       | 333                        | 0.81                            | 2                  |
| <b>P33</b>                         | 491                       | 200                        | 0.41                            | 2                  |
| <b>P40</b>                         | 444                       | 143                        | 0.32                            | >256               |
| <b>P49</b>                         | 402                       | 141                        | 0.35                            | >256               |
| <b>P50</b>                         | 423                       | 133                        | 0.31                            | 256                |
| <b>P55</b>                         | 456                       | 289                        | 0.63                            | 2                  |
| <b>P56</b>                         | 413                       | 588                        | 1.42                            | 2                  |
| <b>P57</b>                         | 448                       | 1000                       | 2.23                            | 2                  |
| <b>P59</b>                         | 377                       | 227                        | 0.60                            | 2                  |
| <b>P60</b>                         | 422                       | 316                        | 0.75                            | 2                  |
| <b>P62</b>                         | 416                       | 240                        | 0.58                            | 2                  |
| <b>P65</b>                         | 406                       | 958                        | 2.36                            | 2                  |
| <b>P69</b>                         | 382                       | 706                        | 1.85                            | 2                  |
| <b>P70</b>                         | 365                       | 211                        | 0.58                            | 2                  |
| <b>P79</b>                         | 387                       | 185                        | 0.48                            | >256               |
| <b>P83</b>                         | 468                       | 356                        | 0.76                            | 2                  |
| <b>P93</b>                         | 402                       | 399                        | 0.99                            | 2                  |
